# Supplementary material for: Study of the interaction mechanism of silver nanoparticles with γ-globulin, fibrinogen and hyaluronidase
Source: Royal Society of Chemistry journal article supplement (doi:10.1039/d2nj05375f), 2023-01-01
Supplement: d2nj05375f4.pdf [file d2nj05375f4.pdf]

## **Study of the interaction mechanism of silver nanoparticles**

### **with $\gamma$ -globulin, fibrinogen and hyaluronidase**

Xiangrong Li <sup>a, \*</sup>, Zeqing Cheng <sup>b</sup>, Ruonan Xu <sup>a</sup>, Ziyang Wang <sup>b</sup>, Li Shi <sup>a</sup>, Yunhui Yan <sup>a, \*</sup>

<sup>a</sup> Department of Medical Chemistry, Key Laboratory of Medical Molecular Probes, School of Basic Medicine, Xinxiang Medical University, Xinxiang, Henan, 453003, PR China

<sup>b</sup> Grade 2020, Clinical Medicine, School of Basic Medicine, Xinxiang Medical University, Xinxiang, Henan, 453003, PR China

\*Address correspondence to Xiangrong Li, Department of Medical Chemistry, School of Basic Medicine, Xinxiang Medical University, Xinxiang, Henan, 453003, PR China

Postal address: Department of Medical Chemistry, School of Basic Medicine, Xinxiang Medical University, 601

Jin-sui Road, Hong Qi District, Xinxiang, 453003, PR China

Tel: +86-373-3029128

E-mail: 1842457577@qq.com

The short title: The interaction of silver nanoparticles with proteins.

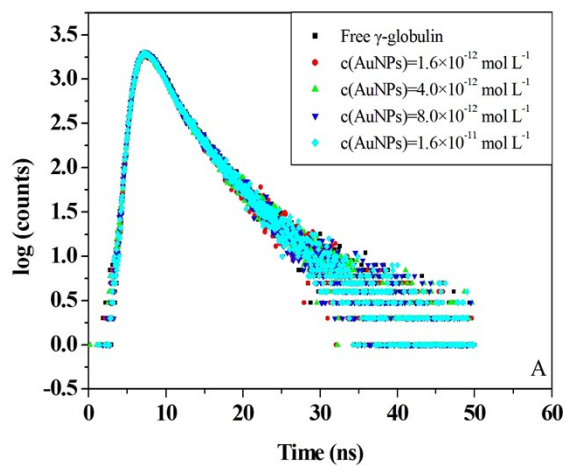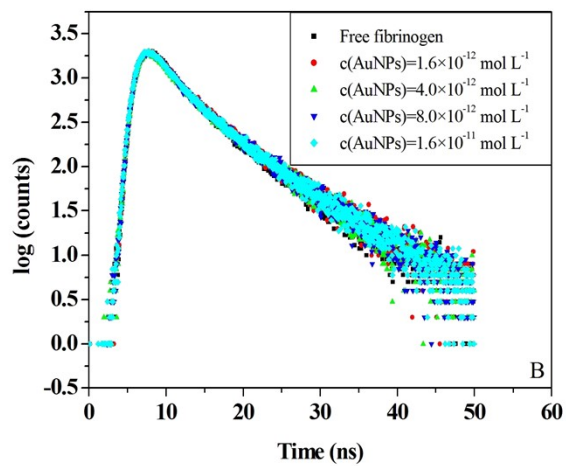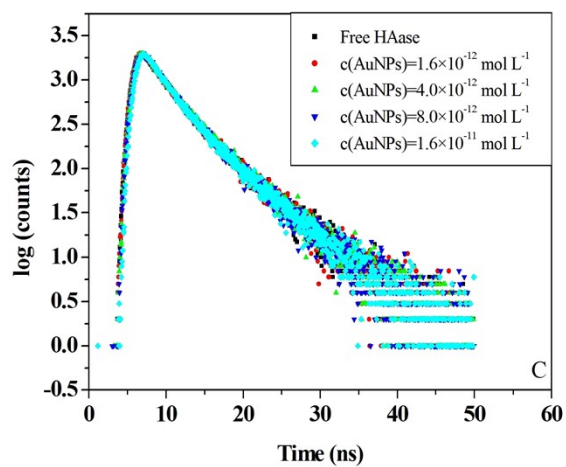

Figure S1. Time-resolved fluorescence decay profile of  $\gamma$ -globulin (A), fibrinogen (B) and HAase (C) in the absence and presence of AgNPs, respectively.  $c(\gamma\text{-globulin})=5.0 \times 10^{-6} \text{ mol L}^{-1}$ ,  $c(\text{fibrinogen})=1.0 \times 10^{-6} \text{ mol L}^{-1}$ ,  $c(\text{HAase})=4.8 \times 10^{-6} \text{ mol L}^{-1}$ .

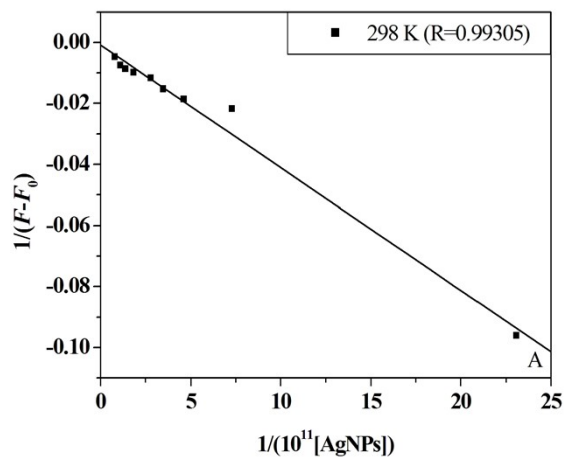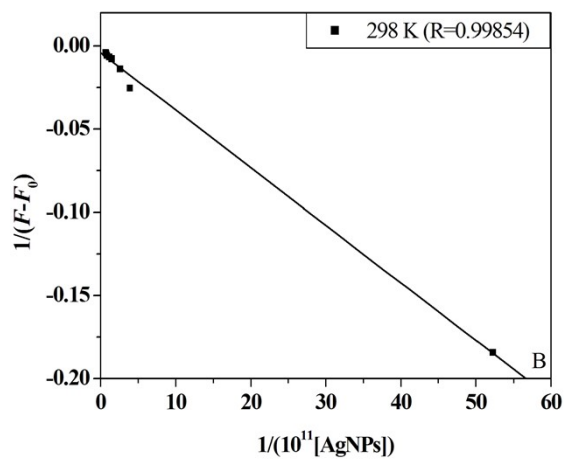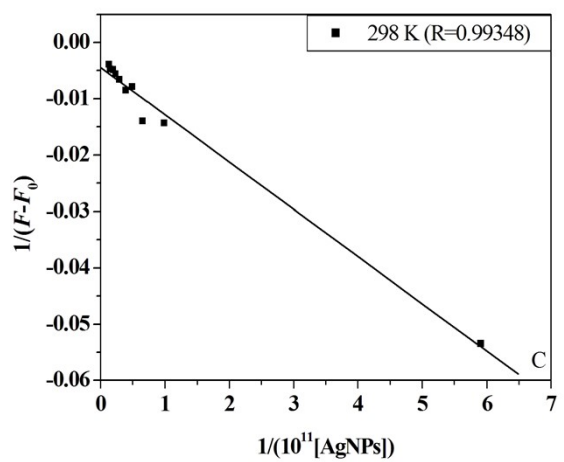

Figure S2. Benesi-Hildebrand double reciprocal plot to determine the stoichiometric association of the AgNPs to  $\gamma$ -globulin (A)/fibrinogen (B)/HAase (C) for 1:1 binding.

Table S1. All time-resolved parameters of  $\gamma$ -globulin/fibrinogen/HAase in the absence and presence of AgNPs.

| System                    | $c(\text{AgNPs})$     | $\tau_1$ (ns) | $\tau_2$ (ns) | $a_1$ | $a_2$ | $\tau_{\text{avg}}$ (ns) | $\chi^2$ |
|---------------------------|-----------------------|---------------|---------------|-------|-------|--------------------------|----------|
| Native $\gamma$ -globulin | /                     | 1.921         | 5.004         | 0.429 | 0.571 | 4.314                    | 1.000    |
| AgNPs- $\gamma$ -globulin | $1.6 \times 10^{-12}$ | 1.952         | 5.112         | 0.454 | 0.546 | 4.351                    | 1.007    |
|                           | $4.0 \times 10^{-12}$ | 2.049         | 5.256         | 0.490 | 0.510 | 4.382                    | 1.000    |
|                           | $8.0 \times 10^{-12}$ | 1.750         | 4.770         | 0.325 | 0.675 | 4.317                    | 1.001    |
|                           | $1.6 \times 10^{-11}$ | 2.262         | 5.480         | 0.586 | 0.414 | 4.293                    | 1.002    |
| Native fibrinogen         | /                     | 3.143         | 7.608         | 0.316 | 0.684 | 6.892                    | 1.018    |
| AgNPs-fibrinogen          | $1.6 \times 10^{-12}$ | 2.574         | 7.151         | 0.266 | 0.734 | 6.623                    | 1.113    |
|                           | $4.0 \times 10^{-12}$ | 2.552         | 7.259         | 0.260 | 0.740 | 6.741                    | 1.026    |
|                           | $8.0 \times 10^{-12}$ | 3.777         | 7.337         | 0.271 | 0.729 | 6.765                    | 1.104    |
|                           | $1.6 \times 10^{-11}$ | 2.988         | 7.800         | 0.389 | 0.611 | 6.857                    | 1.051    |
| Native HAase              | /                     | 1.119         | 5.524         | 0.078 | 0.922 | 5.450                    | 1.001    |
| AgNPs-HAase               | $1.6 \times 10^{-12}$ | 1.214         | 5.732         | 0.058 | 0.942 | 5.674                    | 1.027    |
|                           | $4.0 \times 10^{-12}$ | 2.329         | 6.112         | 0.104 | 0.896 | 5.952                    | 1.000    |
|                           | $8.0 \times 10^{-12}$ | 1.242         | 5.492         | 0.025 | 0.975 | 5.468                    | 1.074    |
|                           | $1.6 \times 10^{-11}$ | 2.005         | 5.578         | 0.059 | 0.941 | 5.499                    | 1.034    |
