# Supplementary figures and images for: Study of the interaction mechanism of silver nanoparticles with γ-globulin, fibrinogen and hyaluronidase
Source: Royal Society of Chemistry journal article supplement (doi:10.1039/d2nj05375f), 2023-01-01

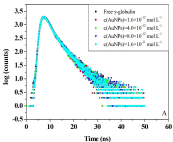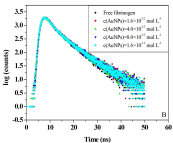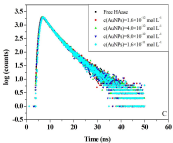

Supplement: d2nj05375f2.pdf [file d2nj05375f2.pdf]

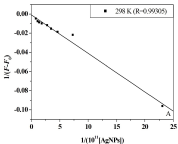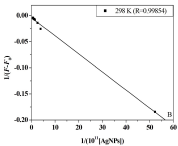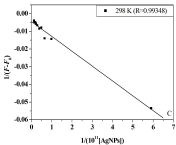

Supplement: d2nj05375f3.pdf [file d2nj05375f3.pdf]
